# Supplementary material for: Probing the electronic and optical properties of silica-coated quantum dots with first-principles calculations
Source: Royal Society of Chemistry journal article supplement (doi:10.1039/c1cp21030k), 2011-01-01
Supplement: c1cp21030k.pdf [file c1cp21030k.pdf]

# Supporting Information

## Probing the electronic and optical properties of silica coated quantum dots with first-principles calculations

Cunku Dong,<sup>a</sup> Xin Li, <sup>\*ab</sup> and Jingyao Qi<sup>b</sup>

<sup>a</sup> *Department of Chemistry, Harbin Institute of Technology, Harbin 150090, China.*

*Fax: +86 451 86403297; Tel: +86 451 86282153; E-mail: Lixin@hit.edu.cn.*

<sup>b</sup> *State Key Lab of Urban Water Resource and Environment, Harbin Institute of Technology, Harbin 150090, China.*

| Index                                                                                                                        | Page |
|------------------------------------------------------------------------------------------------------------------------------|------|
| Table S1. Excitation energies and oscillator strengths of Cd <sub>2</sub> Te <sub>2</sub> cluster                            | S2   |
| Table S2. Excitation energies and oscillator strengths of Cd <sub>2</sub> Te <sub>2</sub> @(SiO <sub>2</sub> ) <sub>24</sub> | S3   |

**Table S1.** Excitation energies ( $\Delta E$  in nm) and oscillator strengths ( $f$ ) of Cd<sub>2</sub>Te<sub>2</sub> cluster for B3LYP/DZVP calculated 10 lowest singlet-singlet excited states at  $D_{2h}$  Symmetry.

| $\Delta E$ | $f$   | transition    | weight |
|------------|-------|---------------|--------|
| 898        | 0.000 | HOMO→LUMO     | 0.690  |
| 663        | 0.000 | HOMO→LUMO+1   | 0.681  |
| 644        | 0.013 | HOMO-1→LUMO   | 0.689  |
| 552        | 0.017 | HOMO-2→LUMO   | 0.655  |
|            |       | HOMO-3→LUMO+1 | -0.179 |
| 528        | 0.000 | HOMO-3→LUMO   | 0.663  |
|            |       | HOMO-2→LUMO+1 | -0.190 |
| 517        | 0.000 | HOMO-1→LUMO+1 | 0.687  |
| 482        | 0.000 | HOMO-3→LUMO   | 0.190  |
|            |       | HOMO-2→LUMO+1 | 0.658  |
| 362        | 0.090 | HOMO-3→LUMO+1 | 0.567  |
|            |       | HOMO-2→LUMO+4 | 0.157  |
|            |       | HOMO→LUMO+2   | 0.324  |
| 314        | 0.220 | HOMO-5→LUMO+1 | -0.200 |
|            |       | HOMO-4→LUMO   | 0.616  |
|            |       | HOMO-1→LUMO+3 | 0.161  |
| 295        | 0.000 | HOMO-5→LUMO   | -0.332 |
|            |       | HOMO-4→LUMO+1 | 0.566  |
|            |       | HOMO-1→LUMO+3 | 0.219  |

**Table S2.** Excitation energies ( $\Delta E$  in nm) and oscillator strengths ( $f$ ) of  $\text{Cd}_2\text{Te}_2@(\text{SiO}_2)_{24}$  for B3LYP/DZVP&6-31G\* calculated 10 lowest singlet-singlet excited states at  $D_{2h}$  Symmetry.

| $\Delta E$ | $f$    | transition    | weight |
|------------|--------|---------------|--------|
| 616        | 0.000  | HOMO→LUMO     | 0.704  |
| 558        | 0.000  | HOMO-1→LUMO   | 0.703  |
| 534        | 0.010  | HOMO-2→LUMO   | 0.701  |
| 530        | 0.000  | HOMO→LUMO+1   | 0.704  |
| 485        | 0.000  | HOMO-1→LUMO+1 | 0.705  |
| 468        | 0.000  | HOMO-2→LUMO+1 | 0.704  |
| 459        | 0.027  | HOMO-3→LUMO   | 0.682  |
|            |        | HOMO→LUMO+2   | -0.173 |
| 449        | 0.0021 | HOMO-4→LUMO   | 0.705  |
| 410        | 0.000  | HOMO-3→LUMO+1 | 0.670  |
|            |        | HOMO→LUMO+4   | 0.216  |
| 406        | 0.0015 | HOMO-3→LUMO   | 0.177  |
|            |        | HOMO→LUMO+2   | 0.682  |
